# Supplementary material for: Diverse mutational landscapes in human lymphocytes
Source: PubMed Central journal article supplement (PMC9402440; doi:10.1038/s41586-022-05072-7), 2022-08-10
Supplement: 41586_2022_5072_MOESM2_ESM.pdf [file 41586_2022_5072_MOESM2_ESM.pdf]

## Reporting Summary

Nature Portfolio wishes to improve the reproducibility of the work that we publish. This form provides structure for consistency and transparency in reporting. For further information on Nature Portfolio policies, see our [Editorial Policies](#) and the [Editorial Policy Checklist](#).

### Statistics

For all statistical analyses, confirm that the following items are present in the figure legend, table legend, main text, or Methods section.

n/a Confirmed

- The exact sample size ( $n$ ) for each experimental group/condition, given as a discrete number and unit of measurement
- A statement on whether measurements were taken from distinct samples or whether the same sample was measured repeatedly
- The statistical test(s) used AND whether they are one- or two-sided  
*Only common tests should be described solely by name; describe more complex techniques in the Methods section.*
- A description of all covariates tested
- A description of any assumptions or corrections, such as tests of normality and adjustment for multiple comparisons
- A full description of the statistical parameters including central tendency (e.g. means) or other basic estimates (e.g. regression coefficient) AND variation (e.g. standard deviation) or associated estimates of uncertainty (e.g. confidence intervals)
- For null hypothesis testing, the test statistic (e.g.  $F$ ,  $t$ ,  $r$ ) with confidence intervals, effect sizes, degrees of freedom and  $P$  value noted  
*Give  $P$  values as exact values whenever suitable.*
- For Bayesian analysis, information on the choice of priors and Markov chain Monte Carlo settings
- For hierarchical and complex designs, identification of the appropriate level for tests and full reporting of outcomes
- Estimates of effect sizes (e.g. Cohen's  $d$ , Pearson's  $r$ ), indicating how they were calculated

*Our web collection on [statistics for biologists](#) contains articles on many of the points above.*

### Software and code

Policy information about [availability of computer code](#)

|                 |                                                                                                                                                                                                                                                                                                                                                                                                                                                                                                                                                                                                                                                                                                                                                                                                                                                                                                                                                                                                                                                                                                                                    |
|-----------------|------------------------------------------------------------------------------------------------------------------------------------------------------------------------------------------------------------------------------------------------------------------------------------------------------------------------------------------------------------------------------------------------------------------------------------------------------------------------------------------------------------------------------------------------------------------------------------------------------------------------------------------------------------------------------------------------------------------------------------------------------------------------------------------------------------------------------------------------------------------------------------------------------------------------------------------------------------------------------------------------------------------------------------------------------------------------------------------------------------------------------------|
| Data collection | No software was used for data collection.                                                                                                                                                                                                                                                                                                                                                                                                                                                                                                                                                                                                                                                                                                                                                                                                                                                                                                                                                                                                                                                                                          |
| Data analysis   | <p>Open source programs used (also stated in manuscript): BWA v0.7.17, CaVEMan v1.11.2, Pindel v3.1.2, BRASS v6.1.2, ASCAT 4.0.1, R v4.0.2, AnnotateBRASS v3, SigProfiler 1.0.0, IgCaller v1.2, FIMO v5.4.1, MCAST v5.4.1, Telomerecat v4.0.2, FlowJo v10.7.1, FCS Express v7.10.0007, Rstudio v1.4.1073.</p> <p>R packages used: hdp v0.1.5, sigfit v2.2., Rsamtools v2.2.3, MASS v7.3.57, GenomicRanges v1.38.0, plyr v1.8.5, ggplot2 v3.2.1, foreach v1.4.8, doParallel v1.0.16, reshape2 v1.4.3, sigfit v2.2, stringr v1.4.0, dplyr v0.8.4, RColorBrewer v1.1.2, BSgenome.Hsapiens.UCSC.hg19 v1.4.3, selectiveInference v1.2.5, gamsel v1.8.1, mgcv v1.8.31, grid v3.5.1, gridExtra v2.3, ggpubr v0.2.4, tidymv v3.2.0, GenomicFeatures v1.42.1, nrmisc v, tidyverse v1.3.0, magrittr v1.5, rtracklayer v1.50.0, BSgenome.Hsapiens.1000genomes.hs37d5 v0.99.1, cowplot v1.0.0</p> <p>Custom code made available (also stated in manuscript): <a href="https://github.com/machadoheather/lymphocyte_somatic_mutation">https://github.com/machadoheather/lymphocyte_somatic_mutation</a></p> <p>No commercial software used.</p> |

For manuscripts utilizing custom algorithms or software that are central to the research but not yet described in published literature, software must be made available to editors and reviewers. We strongly encourage code deposition in a community repository (e.g. GitHub). See the Nature Portfolio [guidelines for submitting code & software](#) for further information.

## Data

Policy information about [availability of data](#)

All manuscripts must include a [data availability statement](#). This statement should provide the following information, where applicable:

- Accession codes, unique identifiers, or web links for publicly available datasets
- A description of any restrictions on data availability
- For clinical datasets or third party data, please ensure that the statement adheres to our [policy](#)

Sequence data that support the findings of this study have been deposited in the European Genome-Phenome Archive (<https://www.ebi.ac.uk/ega/home>), accession EGAD00001008107. The 149 epigenetic datasets are from the ENCODE and IHEC studies and are described in Table S9. The genomic feature datasets are as follows (and described in Table S4): FeatureID: Data\_source  
 ALU\_rep\_dist\_log10: doi.org/10.1038/s41586-019-1913-9  
 centromere\_dist\_log10: doi.org/10.1038/s41586-019-1913-9  
 cpg\_islands\_dist\_log10: doi.org/10.1038/s41586-019-1913-9  
 direct\_rep\_dist\_log10: doi.org/10.1038/s41586-019-1913-9  
 DNA\_rep\_dist\_log10: doi.org/10.1038/s41586-019-1913-9  
 DNAMethylSBS: doi.org/10.1038/s41586-019-1913-9  
 g4\_dist\_log10: doi.org/10.1038/s41586-019-1913-9  
 gc\_content\_value: doi.org/10.1038/s41586-019-1913-9  
 gene\_dens\_1e6: doi.org/10.1038/s41586-019-1913-9  
 H2A.Z: doi.org/10.1038/s41586-019-1913-9  
 H3K27me3: doi.org/10.1038/s41586-019-1913-9  
 H3K36me3: doi.org/10.1038/s41586-019-1913-9  
 H3K4me1: doi.org/10.1038/s41586-019-1913-9  
 H3K4me2: doi.org/10.1038/s41586-019-1913-9  
 H3K4me3: doi.org/10.1038/s41586-019-1913-9  
 H3K79me2: doi.org/10.1038/s41586-019-1913-9  
 H3K9ac: doi.org/10.1038/s41586-019-1913-9  
 H3K9me3: doi.org/10.1038/s41586-019-1913-9  
 H4K20me1: doi.org/10.1038/s41586-019-1913-9  
 L1\_rep\_dist\_log10: doi.org/10.1038/s41586-019-1913-9  
 L2\_rep\_dist\_log10: doi.org/10.1038/s41586-019-1913-9  
 LAD\_dens\_1e6: doi.org/10.1038/s41586-019-1913-9  
 LTR\_rep\_dist\_log10: doi.org/10.1038/s41586-019-1913-9  
 MIR\_rep\_dist\_log10: doi.org/10.1038/s41586-019-1913-9  
 recomb\_rate\_nearest\_value: doi.org/10.1038/s41586-019-1913-9  
 rep\_timing\_Gm: <http://genome.ucsc.edu/cgi-bin/hgFileUi?db=hg19&g=wgEncodeUwRepliSeq>  
 RNAseq: doi.org/10.1038/s41586-019-1913-9  
 short\_tandem\_rep\_dens\_3e3: doi.org/10.1038/s41586-019-1913-9  
 SIMPLE\_REPEAT\_rep\_dist\_log10: doi.org/10.1038/s41586-019-1913-9  
 TAD\_b\_dist\_log10: doi.org/10.1038/s41586-019-1913-9  
 telomere\_dist\_log10: doi.org/10.1038/s41586-019-1913-9  
 triplex\_mirror\_rep\_dist\_log10: doi.org/10.1038/s41586-019-1913-9

## Field-specific reporting

Please select the one below that is the best fit for your research. If you are not sure, read the appropriate sections before making your selection.

- Life sciences       Behavioural & social sciences       Ecological, evolutionary & environmental sciences

For a reference copy of the document with all sections, see [nature.com/documents/nr-reporting-summary-flat.pdf](https://www.nature.com/documents/nr-reporting-summary-flat.pdf)

## Life sciences study design

All studies must disclose on these points even when the disclosure is negative.

### Sample size

We optimised the number of individuals (7) and number of genomes per cell subset per individual (average of 102 genomes per individual) to describe the general mutational landscape per cell subset across a range of ages. No power calculation was performed, and there was no target effect size. The samples were chosen to have a broad distribution across ages, from birth (cord blood) up to 81 years of age, where we would expect to start seeing clonal haematopoiesis. Samples were spaced as evenly as possible across ages, with the limitation of pediatric samples, for which only 4 year old samples were obtainable. Previous studies had found an average mutation rate of 16 mutations per cell per year, which indicated that sampling 7 individuals along the described age range would allow for a statistically significant estimates of mutation rates in lymphocytes.

### Data exclusions

Per pre-established criteria, genomes with a sequencing depth of less than 6x or and average VAF of less than 20% were excluded. This removed a total 39 genomes: 15 KX001 genomes, 12 KX002 genomes and 12 KX003 genomes.

|               |                                                                                                                                                                                                                                      |
|---------------|--------------------------------------------------------------------------------------------------------------------------------------------------------------------------------------------------------------------------------------|
| Replication   | While the specific samples used have been exhausted, most of the results from this study should be generally reproducible in separate healthy individuals of the same age, using the protocols and code included in this manuscript. |
| Randomization | This is not relevant to our study. All individuals were hematopoietically normal, and there was no test versus control groups.                                                                                                       |
| Blinding      | Blinding was not relevant to our study. The study only included samples of normal lymphocytes, and no tests were performed that required blinding.                                                                                   |

## Reporting for specific materials, systems and methods

We require information from authors about some types of materials, experimental systems and methods used in many studies. Here, indicate whether each material, system or method listed is relevant to your study. If you are not sure if a list item applies to your research, read the appropriate section before selecting a response.

### Materials & experimental systems

| n/a                                 | Involved in the study                                           |
|-------------------------------------|-----------------------------------------------------------------|
| <input type="checkbox"/>            | <input checked="" type="checkbox"/> Antibodies                  |
| <input checked="" type="checkbox"/> | <input type="checkbox"/> Eukaryotic cell lines                  |
| <input checked="" type="checkbox"/> | <input type="checkbox"/> Palaeontology and archaeology          |
| <input checked="" type="checkbox"/> | <input type="checkbox"/> Animals and other organisms            |
| <input type="checkbox"/>            | <input checked="" type="checkbox"/> Human research participants |
| <input checked="" type="checkbox"/> | <input type="checkbox"/> Clinical data                          |
| <input checked="" type="checkbox"/> | <input type="checkbox"/> Dual use research of concern           |

### Methods

| n/a                                 | Involved in the study                              |
|-------------------------------------|----------------------------------------------------|
| <input checked="" type="checkbox"/> | <input type="checkbox"/> ChIP-seq                  |
| <input type="checkbox"/>            | <input checked="" type="checkbox"/> Flow cytometry |
| <input checked="" type="checkbox"/> | <input type="checkbox"/> MRI-based neuroimaging    |

## Antibodies

### Antibodies used

Antibody; Company; Clone; Catalogue Number; Fluorophore; Dilution; Panel  
 CD3; BD; HIT3a; 555339; FITC; 1:500; HSPC\_nonAX001  
 CD90; Biolegend; 5E10; 328110; PE; 1:50; HSPC\_nonAX001  
 CD49f; BD; GoH3; 551129; PECy5; 1:100; HSPC\_nonAX001  
 CD19; Biolegend; HIB19; 302226; A700; 1:300; HSPC\_nonAX001  
 CD34; Biolegend; 581; 343514; APCy7; 1:100; HSPC\_nonAX001  
 Zombie ; Biolegend; NA; 423101; Aqua; 1:2000; HSPC\_nonAX001  
 CD38; Biolegend; HIT2; 303516; PECy7; 1:100; HSPC\_nonAX001  
 CD45RA; Biolegend; HI100; 304130; BV421; 1:100; HSPC\_nonAX001  
 CD38; BD; HIT2; 560982; FITC; 1:100; HSPC\_AX001  
 CD135; Biolegend; BV10A4H2; 313306; PE; 1:100; HSPC\_AX001  
 CD34; BD; 581; 560710; PE-Cy7; 1:100; HSPC\_AX001  
 CD90; BD; 5E10; 561971; APC; 1:100; HSPC\_AX001  
 CD10; Biolegend; HI10a; 312212; APC-Cy7; 1:100; HSPC\_AX001  
 CD45RA; BD; HI100; 562298; V450; 1:100; HSPC\_AX001  
 CD3; Tonbo Biosciences; Hit3a; 20-0039-T100; APC; 1:80; lymphocyte\_nonTreg  
 CD4; Biolegend; OKT4; 317441; BV785; 1:80; lymphocyte\_nonTreg  
 CD8; BD; RPA-T8; 563821; BV650; 1:40; lymphocyte\_nonTreg  
 CD19; Biolegend; HIB19; 302226; AF700; 1:80; lymphocyte\_nonTreg  
 CD20; Biolegend; 2H7; 302347; PE Dazzle; 1:80; lymphocyte\_nonTreg  
 CD27; BD; M-T271; 562513; BV421; 1:80; lymphocyte\_nonTreg  
 CD38; Biolegend; HIT2; 356610; FITC; 1:80; lymphocyte\_nonTreg  
 CD45RA; Biolegend; HI100; 560362; PerCP Cy5.5; 1:80; lymphocyte\_nonTreg  
 CCR7; Biolegend; G043H7; 353227; BV711; 1:80; lymphocyte\_nonTreg  
 IgD; Biolegend; IA6-2; 348209; PeCy7; 1:100; lymphocyte\_nonTreg  
 live; Biolegend; n/a; 423101; Zombie aqua; 1:400; lymphocyte\_nonTreg  
 CD3; Tonbo Biosciences; Hit3a; 20-0039-T100; APC; 1:80; Treg  
 CD4; Biolegend; OKT4; 317441; BV785; 1:80; Treg  
 CD8; BD; RPA-T8; 563821; BV650; 1:40; Treg  
 CD19; Biolegend; HIB19; 302226; AF700; 1:80; Treg  
 CD45RA; Biolegend; HI100; 560362; PerCP Cy5.5; 1:80; Treg  
 CD56; Biolegend; 39D5; 355503; PE; 1:80; Treg  
 CCR7; Biolegend; G043H7; 353227; FITC; 1:80; Treg  
 CD25; Biolegend; BC96; 302607; PeCy5; 1:80; Treg  
 CD127; Biolegend; A019D5; 351319; PeCy7; 1:80; Treg  
 CD69; Biolegend; FN50; 310921; AF700; 1:80; Treg  
 CD103; Biolegend; Ber-ACT8; 350213; BV421; 1:80; Treg  
 CCR9; Biolegend; L053E8; 358903; PE; 1:80; Treg  
 live; Biolegend; n/a; 423101; Zombie aqua; 1:400; Treg

### Validation

These were all previously validated commercially available antibodies. Manufacturer validation and references for each can be found:  
 Antibody; Fluorophore; Company; Catalogue Number; ManufacturerInformation  
 CCR7; FITC; Biolegend; 353227; <https://www.biolegend.com/fr-ch/products/fitc-anti-human-cd197-ccr7-antibody-7537>

CCR9; PE; Biolegend; 358903; <https://www.biolegend.com/de-de/products/pe-anti-human-cd199-ccr9-antibody-8761>  
 CD10; APC-Cy7; Biolegend; 312212; <https://www.biolegend.com/fr-ch/products/apc-cyanine7-anti-human-cd10-antibody-4034>  
 CD103; BV421; Biolegend; 350213; <https://www.biolegend.com/de-de/products/brilliant-violet-421-anti-human-cd103-integrin-alphae-antibody-9746>  
 CD127; PeCy7; Biolegend; 351319; <https://www.biolegend.com/fr-fr/products/pe-cyanine7-anti-human-cd127-il-7ralpha-antibody-7216>  
 CD135; PE; Biolegend; 313306; <https://www.biolegend.com/fr-ch/products/pe-anti-human-cd135-flt-3-flk-2-antibody-2359>  
 CD19; AF700; Biolegend; 302226; <https://www.biolegend.com/it-it/products/alexa-fluor-700-anti-human-cd19-antibody-3399>  
 CD20; PE Dazzle; Biolegend; 302347; <https://www.biolegend.com/de-de/products/pe-dazzle-594-anti-human-cd20-antibody-10436>  
 CD25; PeCy5; Biolegend; 302607; <https://www.biolegend.com/en-gb/products/pe-cyanine5-anti-human-cd25-antibody-617>  
 CD27; BV421; BD; 562513; <https://www.bdbiosciences.com/en-us/products/reagents/flow-cytometry-reagents/research-reagents/single-color-antibodies-ruo/bv421-mouse-anti-human-cd27.562513>  
 CD3; FITC; BD; 555339; <https://www.bdbiosciences.com/en-us/products/reagents/flow-cytometry-reagents/research-reagents/single-color-antibodies-ruo/fitc-mouse-anti-human-cd3.555339>  
 CD3; APC; Tonbo Biosciences; 20-0039-T100; <https://tonbobio.com/products/apc-anti-human-cd3-hit3a>  
 CD34; APCCy7; Biolgend; 343514; <https://www.biolegend.com/fr-lu/products/apc-cyanine7-anti-human-cd34-antibody-6159>  
 CD34; PE-Cy7; BD; 560710; <https://www.bdbiosciences.com/en-gb/products/reagents/flow-cytometry-reagents/research-reagents/single-color-antibodies-ruo/pe-cy-7-mouse-anti-human-cd34.560710>  
 CD38; PECy7; Biolgend; 303516; <https://www.biolegend.com/fr-ch/products/pe-cyanine7-anti-human-cd38-antibody-5418>  
 CD38; FITC; Biolegend; 356610; <https://www.biolegend.com/en-ie/products/fitc-anti-human-cd38-antibody-14047>  
 CD38; FITC; BD; 560982; <https://www.bdbiosciences.com/en-us/products/reagents/flow-cytometry-reagents/research-reagents/single-color-antibodies-ruo/fitc-mouse-anti-human-cd38.560982>  
 CD4; BV785; Biolegend; 317441; <https://www.biolegend.com/fr-lu/products/brilliant-violet-785-anti-human-cd4-antibody-7978>  
 CD45RA; BV421; Biolgend; 304130; <https://www.biolegend.com/de-de/products/brilliant-violet-421-anti-human-cd45ra-antibody-7200>  
 CD45RA; PerCP Cy5.5; Biolegend; 560362; <https://www.biolegend.com/en-us/search-results/percp-cyanine5-5-anti-human-cd45ra-antibody-4241>  
 CD45RA; V450; BD; 562298; <https://www.bdbiosciences.com/en-gb/products/reagents/flow-cytometry-reagents/research-reagents/single-color-antibodies-ruo/v450-mouse-anti-human-cd45ra.560363>  
 CD49f; PECy5; BD; 551129; <https://www.bdbiosciences.com/zh-cn/products/reagents/flow-cytometry-reagents/research-reagents/single-color-antibodies-ruo/pe-cy-5-rat-anti-human-cd49f.551129>  
 CD56; PE; Biolegend; 355503; <https://www.biolegend.com/en-us/products/pe-anti-human-cd56-subset-msc-marker-antibody-8191>  
 CD69; AF700; Biolegend; 310921; <https://www.biolegend.com/fr-ch/products/alexa-fluor-700-anti-human-cd69-antibody-3425>  
 CD8; BV650; BD; 563821; <https://www.bdbiosciences.com/ko-kr/products/reagents/flow-cytometry-reagents/research-reagents/single-color-antibodies-ruo/bv650-mouse-anti-human-cd8.563821>  
 CD90; PE; Biolgend; 328110; <https://www.biolegend.com/it-it/products/pe-anti-human-cd90-thy1-antibody-4114>  
 CD90; APC; BD; 561971; <https://www.bdbiosciences.com/en-ca/products/reagents/flow-cytometry-reagents/research-reagents/single-color-antibodies-ruo/fitc-mouse-anti-human-cd90.555595>  
 IgD; PeCy7; Biolegend; 348209; <https://www.biolegend.com/en-us/search-results/pe-cyanine7-anti-human-igd-antibody-6996>  
 live; Zombie aqua; Biolegend; 423101; <https://www.biolegend.com/fr-fr/products/zombie-aqua-fixable-viability-kit-8444>

## Human research participants

Policy information about [studies involving human research participants](#)

### Population characteristics

*Describe the covariate-relevant population characteristics of the human research participants (e.g. age, gender, genotypic information, past and current diagnosis and treatment categories). If you filled out the behavioural & social sciences study design questions and have nothing to add here, write "See above."*

### Recruitment

*Describe how participants were recruited. Outline any potential self-selection bias or other biases that may be present and how these are likely to impact results.*

### Ethics oversight

*Identify the organization(s) that approved the study protocol.*

Note that full information on the approval of the study protocol must also be provided in the manuscript.

## Flow Cytometry

### Plots

Confirm that:

- The axis labels state the marker and fluorochrome used (e.g. CD4-FITC).
- The axis scales are clearly visible. Include numbers along axes only for bottom left plot of group (a 'group' is an analysis of identical markers).
- All plots are contour plots with outliers or pseudocolor plots.
- A numerical value for number of cells or percentage (with statistics) is provided.

### Methodology

#### Sample preparation

All samples were received as viably frozen human blood mononuclear cells (MNCs) obtained from bone marrow, spleen, tonsil and peripheral blood from seven individuals.

|                           |                                                                                                                                                                                                                                                                                                                                                                                                                                                                                                                                                                                                                                           |
|---------------------------|-------------------------------------------------------------------------------------------------------------------------------------------------------------------------------------------------------------------------------------------------------------------------------------------------------------------------------------------------------------------------------------------------------------------------------------------------------------------------------------------------------------------------------------------------------------------------------------------------------------------------------------------|
| Instrument                | Sorting was performed on FACSARIA III or FACSARIA Fusion (BD Biosciences).                                                                                                                                                                                                                                                                                                                                                                                                                                                                                                                                                                |
| Software                  | During the sort data were collected using the FACSARIA III or FACSARIA Fusion (BD Biosciences) default software. Plotting of the gating strategy supplementary figure was done on FlowJo and plotting of the index sort data for the culture bias supplementary figure was done using FCS Express.                                                                                                                                                                                                                                                                                                                                        |
| Cell population abundance | This study used no data on relative cell abundances for any of the samples.                                                                                                                                                                                                                                                                                                                                                                                                                                                                                                                                                               |
| Gating strategy           | The FSC/SSC gate was set using the manual gating tool to exclude debris and small particles and to identify the lymphocyte fraction of cells as displayed in Supplementary Figure S1. Further gating was as follows: naive B lymphocytes (CD3-CD19+CD20+CD27-CD38-IgD+), memory B lymphocytes (CD3-CD19+CD20+CD27+CD38-IgD-), naive T lymphocytes (CD3+CD4/CD8+CCR7+CD45RA <sup>high</sup> ), memory T lymphocytes (CD3+CD4/CD8+CD45RA-), regulatory T cells (Tregs: CD3+CD4+CD25 <sup>high</sup> CD127-) and HSPCs (CD3-CD19-CD34+CD38-CD90+CD45RA-). HSPCs from AX001 included HSCs (CD34+CD38-) and progenitors (CD34+CD38+CD10-/dim). |

Tick this box to confirm that a figure exemplifying the gating strategy is provided in the Supplementary Information.
